# Supplementary material for: Single-epitope T cell–based vaccine protects against SARS-CoV-2 infection in a preclinical animal model
Source: JCI journal article supplement (doi:10.1172/jci.insight.167306), 2023-04-09
Supplement: sd1 [file 1]

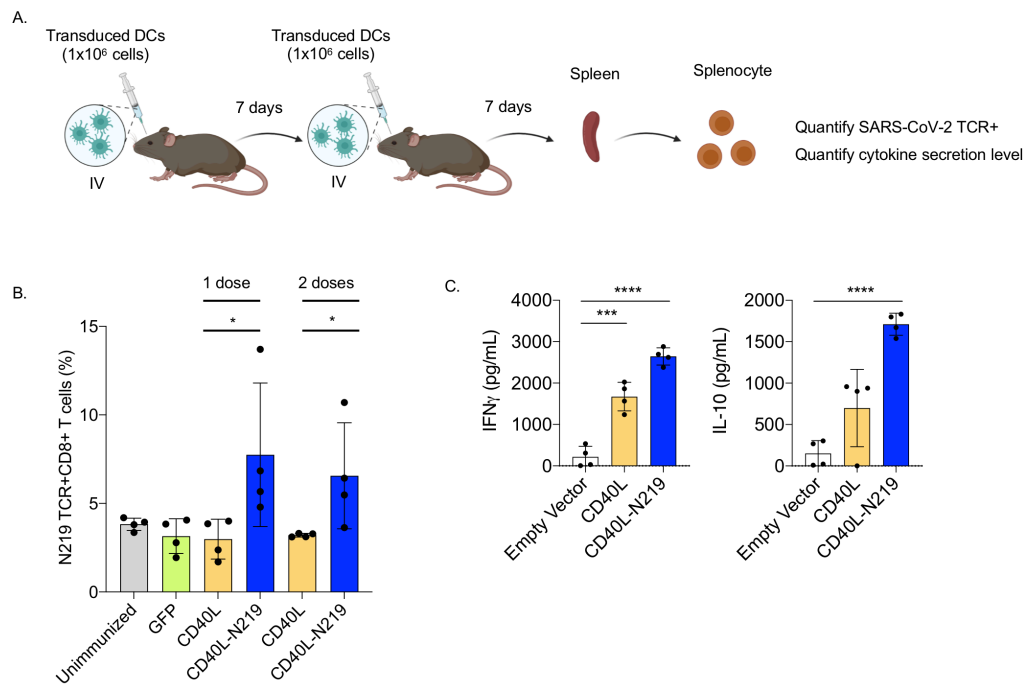

**Supplementary Figure 1. Second doses immunization by transduced DC induced a strong immune response.**

(A) Schematic of immunization. DCs were transduced with lentivirus encoding GFP, CD40L, and CD40L-N<sub>219-227</sub>.  $1 \times 10^6$  cells of transduced DCs were injected into ACE2 transgenic mice via IV injection (n=4). One week after first immunization, mice were immunized again with  $1 \times 10^6$  cells of transduced DCs.

(B) After first and second doses of DC injection, splenocytes were harvested from immunized mice. The numbers of SARS-CoV-2 TCR+ CD8+ T cells were determined by flow cytometry.

(C) Seven days post-second immunization, splenocytes were incubated with 1  $\mu$ g/ml of N<sub>219-227</sub> peptide for 3 days after which cytokine levels (IFN $\gamma$  and IL-10) in the supernatant were determined by cytokine bead array. Statistical significance was determined by Kruskal-Wallis test with post hoc Dunn's test. Confidence intervals are shown as the mean  $\pm$  SD. (\*P  $\leq$  0.05, \*\*\*P  $\leq$  0.001, \*\*\*\*P  $\leq$  0.0001). **The experiment was done twice with similar results.**

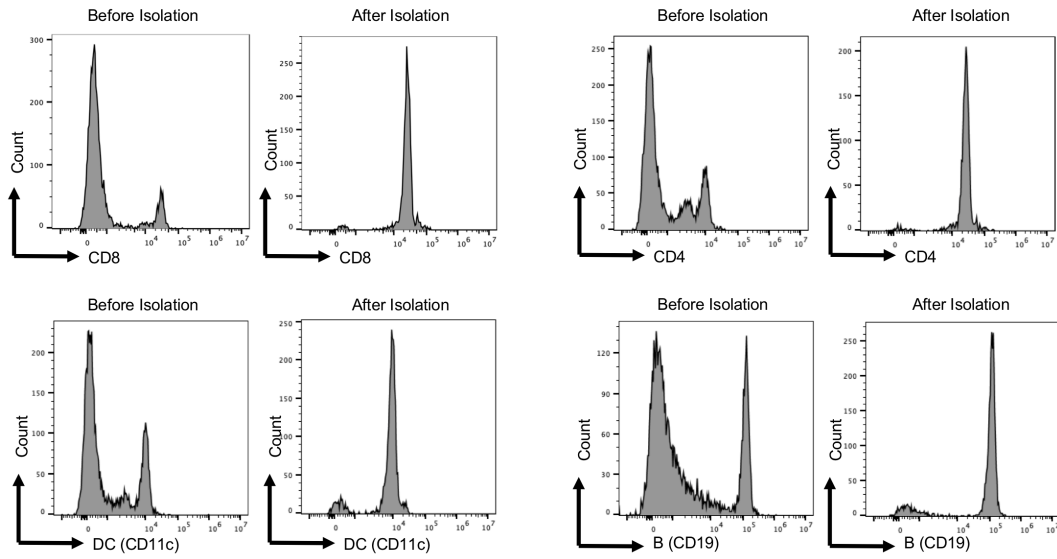

**Supplementary Figure 2. Analysis of magnetic bead-purified cell populations.**

Mice were immunized twice with DCs transduced with CD40L or CD40L-N<sub>219-227</sub> vector. Seven days post-second immunization, splenic CD8+ T, CD4+ T, DC, and B cell populations were isolated on magnetic beads. The populations were analyzed by flow cytometry with antibodies to CD8, CD4, CD11c, and CD19. **The experiment was done twice with similar results.**

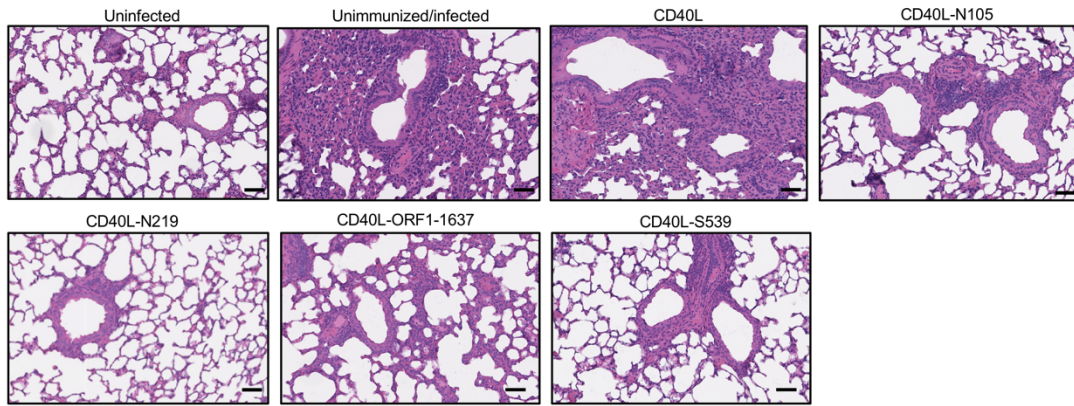

**Supplementary Figure 3. Histology of lungs from mice vaccinated by direct lentivirus injection.**

Hematoxylin and eosin stained lung sections of mice immunized with direct lentivirus injection and challenged with SARS-CoV-2 WA1/2020. 50 $\mu$ m scale bars are at lower right.
